# Supplementary material
Source: ML conference proceedings conference paper supplement (https://proceedings.neurips.cc/paper_files/paper/2008/hash/b99d193b66a6542917d2b7bee52c2574-Abstract.html)
Supplement: Supplementary file 1 [file b99d193b66a6542917d2b7bee52c2574-Supplemental.zip]

# *Supplementary Material to:* On Computational Power and the Order-Chaos Phase Transition in Reservoir Computing

## 1 Computational Performance for Further Example Tasks

In this section the performance measure  $p_{\text{exp}}$  defined in eq. (1) in the main text [1] for two further example tasks is shown. In Fig. 1  $p_{\text{exp}}(C, \text{RAND}_5)$  is plotted, averaged over 20 randomly chosen 5-bit functions  $\text{RAND}_5$ , circuits  $C$ , initial conditions and input streams. A uniform distribution over all  $2^{2^5}$  functions  $\text{RAND}_5 : \{-1, +1\}^5 \rightarrow \{-1, 1\}$  was applied. In Fig. 2 the quantity  $p_{\text{exp}}(C, \text{AND}_5)$  for the 5-bit AND-function is plotted, i.e. the target output at time  $t$  is  $\text{AND}_{5,\tau}(u, t) = \max_{i \in \{1, \dots, 5\}} \{u(t - \tau - i)\}$  for delay  $\tau$ . Shown results are averages over 10 circuits  $C$ , initial conditions and input streams. The results shown in Fig. 1 and 2 are qualitatively similar to the results on the PAR-task reported in [1].

## 2 Definition and Calculation of $p_{\infty}$

In this section we give a detailed definition of the heuristic performance measure  $p_{\infty}$  and outline an approach to calculate it efficiently.

### 2.1 Notation

Without loss of generality we may set the readout time  $t$  to 0 as the input random process  $u(\cdot)$  is assumed to be stationary. Hence the target task of the  $n$  last input bits (delay  $\tau = 0$ ) is a function  $f_T$  of  $u(-1), \dots, u(-n)$ . We introduce the following useful notation for the input:

$$\begin{aligned} u^i &:= (u^i(-1), u^i(-2), \dots) \in \{-1, 1\}^{\mathbb{N}} \\ u^{i,t} &:= (u^i(t-1), u^i(t-2), \dots) \in \{-1, 1\}^{\mathbb{N}} \end{aligned}$$

For a vector  $x = (x_1, \dots, x_N) \in \mathbb{R}^N$  we use the  $p$ -norm  $\|\cdot\|_p$  with  $p = 1$  (the Manhattan norm) for measuring distances:

$$\|x\|_1 = \sum_{i=1}^N |x_i|.$$

### 2.2 Definition of $p_{\infty}$

In the following we consider two instances N1 and N2 of the same network which solely differ in the input streams  $u^1(\cdot)$  and  $u^2(\cdot)$  they receive. Let  $d(k)$  be the normalized expected distance between the two network states  $x^1(0)$  and  $x^2(0)$  of N1 and N2 at time 0 for the case where the inputs  $u^1(\cdot)$  and  $u^2(\cdot)$  only differ at the single time step  $t = -k$ . Hence for given  $u^1$ , the sequence  $u^2$  is determined by:

$$\begin{aligned} u^2(-i) &= u^1(-i) \quad \forall i \in \mathbb{N} \wedge i \neq k \\ u^2(-k) &= -u^1(-k). \end{aligned}$$

$\forall k \in \mathbb{N}$  the inputs  $u^1(-k) \in \{-1, +1\}$  are iid. with probability  $p(u^1(-k) = 1) =: 0.5$ .  $d(k)$  is then formally defined as:

$$d(k) := \frac{1}{N} \langle \langle \|x^1(0) - x^2(0)\|_1 \rangle_W \rangle_u. \quad (1)$$

The average  $\langle \cdot \rangle_u$  is taken over all inputs  $u^1(\cdot), u^2(\cdot)$  from the ensemble defined above and all initial conditions of the network;  $\langle \cdot \rangle_W$  denotes the average over all weight matrices  $W$ . If the network is not in the fading memory regime (or equivalently: if it does not have the echo state property, for a formal definition see [2] or [3])  $d(k)$  defined in (1) might well depend on the distribution of initial conditions from which the evolution of  $x^1$  and  $x^2$  starts; we address this subtle point below. We define  $p_\infty$  in the following way:

$$p_\infty = \max\left\{\lim_{k \rightarrow \infty} (d(2) - d(k)), 0\right\} = \max\{d(2) - d(\infty), 0\}.$$

### 2.3 The Annealed Approximation

We want to calculate the distance  $d(k)$  defined in (1) for large networks  $N \rightarrow \infty$  using the annealed approximation (AA) introduced in [4]. The AA consists of approximating the original dynamics of the network by assuming that the weight matrix  $W$  is drawn iid. at every time step. First we notice that in the AA and the limit  $N \rightarrow \infty$  the following holds:

$$\begin{aligned} d(k) &= \left\langle \left\langle \frac{1}{N} \sum_{b=1}^N |x_b^1(0) - x_b^2(0)| \right\rangle_W \right\rangle_u = \langle \langle |x_a^1(0) - x_a^2(0)| \rangle_W \rangle_u \quad \forall a \in \mathbb{N} \\ d(k) &\xrightarrow{N \rightarrow \infty} \left\langle \left| \sum_{i,j=0}^{2^m-1} p(x_a^1(t) = s_i, x_a^2(t) = s_j | u^{1,t}, u^{2,t}) (s_i - s_j) \right| \right\rangle_u \quad \forall a \in \mathbb{N}. \end{aligned} \quad (2)$$

Here  $p(x_a^1(t) = s_i, x_a^2(t) = s_j | u^{1,t}, u^{2,t})$  denotes the joint probability of finding  $x_a^1(t)$  in the state  $s_i$  and  $x_a^2(t)$  in the state  $s_j$  given the input  $u^{1,t}, u^{2,t}$ . Due to the AA this probability is independent of the node index  $a$ . Moreover  $p(x_a^1(t) = s_i, x_a^2(t) = s_j | u^{1,t}, u^{2,t})$  determines the distribution of the recurrent feedback for the next time step. Hence, in the AA and for  $N \rightarrow \infty$  the state of the network is completely described by the joint distribution of a pair of coordinates  $x_a^1(t)$  and  $x_a^2(t)$  in the state space  $\mathcal{S} \times \mathcal{S}$ . We therefore define the probability  $q$  in the following way:

$$\begin{aligned} q_{ij}(t, u^{1,t}, u^{2,t}) &:= p(x_a^1(t) = s_i, x_a^2(t) = s_j | u^{1,t}, u^{2,t}) \\ q(t, u^{1,t}, u^{2,t}) &:= (q_{ij}(t, u^{1,t}, u^{2,t}))_{i,j \in \{0, \dots, 2^m-1\}}. \end{aligned}$$

Thus  $q(t, u^{1,t}, u^{2,t})$  is the  $2^m \times 2^m$  matrix whose entry  $q_{i,j}$  is the joint probability of finding  $x_a^1(t)$  in the state  $s_i$  and  $x_a^2(t)$  in  $s_j$  after applying the input  $u^{1,t}$  and  $u^{2,t}$  respectively. Using  $q$  we can rewrite (2) as:

$$\begin{aligned} d(k) &= \left\langle \left| \sum_{i,j=0}^{2^m-1} q_{ij}(0, u^1, u^2) (s_i - s_j) \right| \right\rangle_u \\ &= \left\langle \left| 2^{1-m} \sum_{i,j=0}^{2^m-1} q_{ij}(0, u^1, u^2) (i - j) \right| \right\rangle_u. \end{aligned}$$

We need to calculate  $q_{ij}(t, u^{1,t}, u^{2,t})$  at time  $t = 0$  in order to determine  $d(k)$ . This can be achieved iteratively via the mapping  $S$  representing the transition from time step  $t$  to  $t + 1$  by applying the input pair  $u^1(t)$  and  $u^2(t)$ :

$$q(t + 1, u^{1,t+1}, u^{2,t+1}) = S(q(t, u^{1,t}, u^{2,t}), u^1(t), u^2(t)).$$

The  $k$ -fold composition of  $S$  with the inputs  $u^1$  and  $u^2$  is denoted by  $S_{u^1, u^2}^{(k)}$ :

$$\begin{aligned} q(t, u^{1,t}, u^{2,t}) &= S_{u^1, u^2}^{(k)}(q(t-k, u^{1,t-k}, u^{2,t-k})) \\ q(t, u^{1,t}, u^{2,t}) &= \lim_{k \rightarrow \infty} \left( S_{u^1, u^2}^{(k)}(q(t-k, u^{1,t-k}, u^{2,t-k})) \right). \end{aligned}$$

For the sake of fast numerical evaluation, we calculate  $q(0, u^1, u^2)$  by starting at  $t = -n$  with the initial condition  $q^*$ :

$$q(0, u^1, u^2) = S_{u^1, u^2}^{(n)}(q^*).$$

The initial condition  $q^* := 2^{-m} \text{id}_{2^m \times 2^m}$  (where  $\text{id}_{n \times m}$  is the  $n \times m$  identity matrix) was chosen because of the following relation:

$$q^* = \langle q(t, u^1, u^1) \rangle_{u^1}.$$

## 2.4 Separation approximation

Unfortunately the complexity to calculate  $q$  scales like  $\mathcal{O}(2^{2m})$  (capital  $\mathcal{O}$  notation) with the number of bits  $m$ . This basically renders the approach described above useless for  $m > 5$ . However, this can be circumvented by generalizing the AA in the following way. Since the state  $x_a^i(t)$  of neuron  $a$  is quantized with  $m$  bits, we can write it in the following way:

$$\begin{aligned} x_a^i(t) &= \sum_{l=0}^{m-1} 2^{-l} (b_l^i(t) - 1/2), \quad b_l^i(t) \in \{0, 1\} \\ B_l(x_a^i(t)) &:= b_l^i(t). \end{aligned} \tag{3}$$

According to (3) there is a unique binary representation of  $x_a^i(t)$  given by  $(b_0^i(t), \dots, b_{m-1}^i(t))$ ; the mapping  $B_l(\cdot)$  maps a state to its  $l^{\text{th}}$  bit. Equation (3) can be interpreted as effectively replacing unit  $a$  with  $m$  binary units of states  $b_l^i(t)$  whose outputs are reduced by  $1/2$  and multiplied by  $2^{-l}$  and finally summed up; this is still exact. Now we assume that each of these  $m$  units receives input drawn independently from the input distribution and has different weights drawn independently from  $N(0, \sigma^2)$  every time step; hence this approach generalizes the AA. Therefore, for given presynaptic input the  $b_l^i(t)$  are independent for different  $i$  and  $l$  under this approximation. Thus:

$$\begin{aligned} q_{ij}(t, u^{1,t}, u^{2,t}) &\approx \prod_{l=0}^{m-1} q_{B_l(s_i), B_l(s_j)}^l(t, u^{1,t}, u^{2,t}) \\ q^l(t, u^{1,t}, u^{2,t}) &= (q_{b_1^1, b_1^2}^l(t, u^{1,t}, u^{2,t}))_{b_1^1, b_1^2 \in \{0, 1\}}. \end{aligned}$$

$q^l(t, u^{1,t}, u^{2,t})$  is the  $2 \times 2$  matrix, whose entry  $q_{b_1^1, b_1^2}^l(t, u^{1,t}, u^{2,t})$  is the joint probability of finding the bit number  $l$  of unit  $x_a^1(t)$  in state  $b_1^1 \in \{0, 1\}$  and of unit  $x_a^2(t)$  in state  $b_1^2 \in \{0, 1\}$ . Under this approximation we only have to calculate  $4m$  matrix entries instead of the  $2^{2m}$  entries, which is a considerable reduction of complexity.

We denote the update mapping for  $q^l$  by  $S^l$ :

$$q^l(t+1, u^{1,t+1}, u^{2,t+1}) = S^l(q^l(t, u^{1,t}, u^{2,t}), u^1(t), u^2(t)).$$

An explicit form for  $S^l$  can be derived in the following way. First we condition the probability  $q^l(t+1, u^{1,t+1}, u^{2,t+1})$  on the presynaptic input  $h^1 = (h_1^1, \dots, h_K^1)$  for network N1 and  $h^2 = (h_1^2, \dots, h_K^2)$  for network N2 and on the weight matrix  $W$  for this time step (which is the same for N1 and N2). The pairs  $(h_i^1, h_i^2)$ ,  $i \in 1, \dots, K$  are iid. according to  $q(t, u^{1,t}, u^{2,t})$ . This yields:

$$\begin{aligned} q^l(t+1, u^{1,t+1}, u^{2,t+1}) &= \langle \langle q^l(t+1, u^{1,t+1}, u^{2,t+1} | h^1, h^2, w) \rangle_W \rangle_{h^1, h^2} \\ &= \sum_{h^1, h^2} p(h^1, h^2) \int dW p(W) q^l(t+1, u^{1,t+1}, u^{2,t+1} | h^1, h^2, W). \end{aligned} \tag{4}$$

We used the following abbreviations :

$$\begin{aligned}
\langle X(h^1, h^2) \rangle_{h^1, h^2} &:= \sum_{h^1, h^2} p(h^1, h^2) X(h^1, h^2) \\
&= \sum_{h_1^1, h_1^2} \cdots \sum_{h_K^1, h_K^2} \left( \prod_{i=1}^K q_{h_i^1, h_i^2}(t, u^{1,t}, u^{2,t}) \right) X(h^1, h^2) \\
\langle X(W) \rangle_W &:= \int_{\mathbb{R}} dW p(W) X(W) = \int_{\mathbb{R}} \cdots \int_{\mathbb{R}} X(W) p(w_1, \dots, w_K) dw_1 \cdots dw_K.
\end{aligned} \tag{5}$$

Here  $w_1, \dots, w_K$  denote the  $K$  presynaptic weights. Conditioned on the input and the weights, the network realizations N1 and N2 are independent:

$$\begin{aligned}
q_{ij}^l(t+1, u^{1,t+1}, u^{2,t+1} | h^1, h^2, w) &= p(b_l^1(t+1) = i | h^1, w) p(b_l^2(t+1) = j | h^2, w) \\
&= \delta(B_l(f_m(w^T h^1 + u^1(t))), i) \delta(B_l(f_m(w^T h^2 + u^2(t))), j) \\
w^T h^i &:= \sum_{\alpha=1}^K w_{\alpha} h_{\alpha}^i.
\end{aligned}$$

$\delta(.,.)$  denotes the Kronecker-Delta of its two arguments. The  $K$ -fold integral over the weights appearing in (4) can be reduced to a single integral:

$$\begin{aligned}
\int dW p(W) q_{ij}^l(t+1, u^{1,t+1}, u^{2,t+1} | h^1, h^2, W) &= F_{ij}^l(h^1, h^2, u^1(t), u^2(t)) \\
F_{ij}^l(h^1, h^2, u^1(t), u^2(t)) &= \frac{1}{(8\pi \det(C) \Sigma_{22})^{1/2}} \sum_{\alpha=0}^{2^l-1} \int_{I_{\alpha,i}-u^1(t)} dv \exp\left(-\frac{v^2}{2} \left(\Sigma_{11} - \frac{\Sigma_{12}^2}{\Sigma_{22}}\right)\right) \times \\
&\quad \sum_{\beta=0}^{2^l-1} \left[ \operatorname{erf}\left(\frac{(I_{\beta,j}^+ - u^2(t))\Sigma_{22} + \Sigma_{21}v}{(2\Sigma_{22})^{1/2}}\right) - \operatorname{erf}\left(\frac{(I_{\beta,j}^- - u^2(t))\Sigma_{22} + \Sigma_{21}v}{(2\Sigma_{22})^{1/2}}\right) \right]
\end{aligned}$$

Here we use the following definitions:

$$\begin{aligned}
C &= \sigma^2 \begin{pmatrix} (h^1)^T h^1 & (h^1)^T h^2 \\ (h^2)^T h^1 & (h^2)^T h^2 \end{pmatrix} \\
\Sigma_{ij} &= (C^{-1})_{ij} \\
\bigcup_{\alpha=0}^{2^l-1} I_{\alpha,i} &= \operatorname{supp}(\delta(B_l(f_m(.)), i)) \\
I_{\alpha,i} &= [I_{\alpha,i}^-, I_{\alpha,i}^+] \\
I_{\alpha,i}^- &:= \tanh^{-1}(2^{-l+1}\alpha - 1) \\
I_{\alpha,i}^+ &:= \tanh^{-1}(2^{-l+1}(\alpha + 1) - 1).
\end{aligned}$$

The support of the function  $\delta(B_l(f_m(.)), i)$  is the union of  $2^l$  disjoint intervals  $I_{\alpha,i}$  with lower bound  $I_{\alpha,i}^-$  and upper bound  $I_{\alpha,i}^+$ .

Using the expression  $F_{ij}^l$  the update can finally be written as:

$$q_{ij}^l(t+1, u^{1,t+1}, u^{2,t+1}) = \langle F_{ij}^l(h^1, h^2, u^1(t), u^2(t)) \rangle_{h^1, h^2}.$$

For the sake of computational tractability for larger  $m$  and  $K$ , we do not evaluate the  $2K$  sums explicitly involved in the average over the presynaptic input  $\langle . \rangle_{h^1, h^2}$ . Instead we determine this expectation value by a finite number of samples from the joint distribution  $p(h^1, h^2)$ ; this sampling is easily realizable since  $p(h^1, h^2)$  is of the product form given in (5); sample size for all experiments was chosen to be 150.

## References

- [1] Anonymous Author(s). On Computational Power and the Order-Chaos Phase Transition in Reservoir Computing, 2008. submitted for publication.
- [2] H. Jaeger. The “echo state” approach to analyzing and training recurrent neural networks. GMD Report 148, German National Research Center for Information Technology, 2001.
- [3] W. Maass, T. Natschläger, and H. Markram. Real-time computing without stable states: A new framework for neural computation based on perturbations. *Neural Computation*, 14(11):2531–2560, 2002.
- [4] B. Derrida and Pomeau Y. Random networks of automata: A simple annealed approximation. *Europhysics Letters*, 1(2):45–49, 1986.

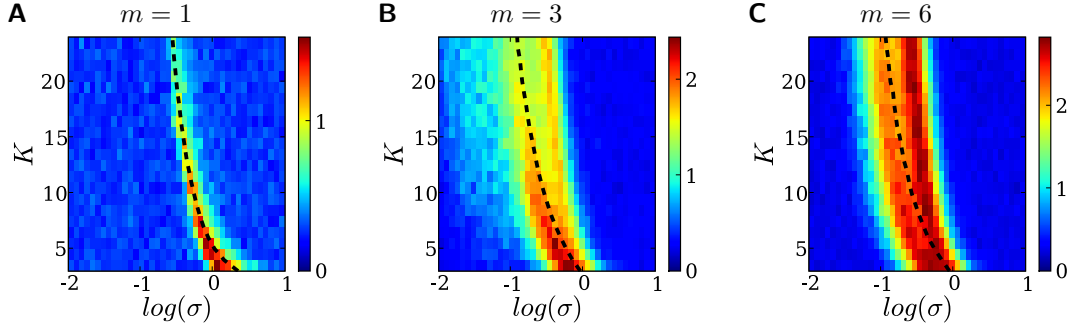

Figure 1: The performance  $p_{\text{exp}}(C, \text{RAND}_5)$  for three different quantization levels  $m = 1, 3, 6$ , averaged over 20 randomly drawn functions of 5 bits, circuits  $C$ , initial conditions and input streams.  $p_{\text{exp}}(C, \text{RAND}_5)$  is plotted as a function of the network in-degree  $K$  and the weight STD  $\sigma$ . The networks size is  $N = 150$ . The input time series have length 10000. The solid line represents the numerically found critical line.

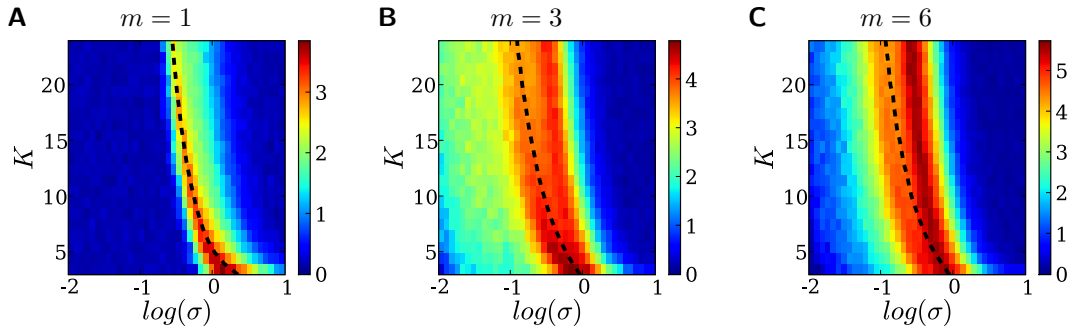

Figure 2: Same figure as Fig. 1 showing the performance  $p_{\text{exp}}(C, \text{AND}_5)$  for the 5-bit AND-task averaged over 10 circuits  $C$ , initial conditions and input streams.
