# Supplementary material
Source: ML conference proceedings conference paper supplement (https://proceedings.neurips.cc/paper_files/paper/2008/hash/b99d193b66a6542917d2b7bee52c2574-Abstract.html)
Supplement: Supplementary file 2 [file b99d193b66a6542917d2b7bee52c2574-Supplemental.zip]

Archive with 1 entries (1 files):
- Suppl_Material.pdf
